# Supplementary material for: A High-K+ Affinity Transporter (HKT) from Actinidia valvata Is Involved in Salt Tolerance in Kiwifruit
Source: MDPI journal article supplement (doi:10.3390/ijms242115737), 2023-10-30
Supplement: s1 [file s1]

**Table S1.** All the sequences of pair of primers used in the current study

| All the sequences of pair of primers used in the current study |              |                                                   |                    |
|----------------------------------------------------------------|--------------|---------------------------------------------------|--------------------|
| Assay                                                          | Primer names | Primer Sequence                                   | Restriction Site   |
| Gene clon                                                      | AvHKT1(F)    | ATGCCCAAGGACTTGGACTT                              |                    |
|                                                                | AvHKT1(R)    | TCACATCATCACAACGAACACCA                           |                    |
| transformation                                                 | AvHKT1(F)    | gagaacacgggggactctagaATGCCCAAGGACTTGGACTTG        | <i>XbaI, BamH1</i> |
|                                                                | AvHKT1(R)    | gcccttgctaccatggatccCATCATCACAACGAACACCACC        |                    |
| transgenic line detection                                      | 35S-30(F)    | AACCTCCTCGGATTCCATTGCC                            |                    |
|                                                                | AvHKT1(R)    | TCACATCATCACAACGAACACCA                           |                    |
| ACTIN                                                          | F            | TGCATGAGCGATCAAGTTTCAAG                           |                    |
|                                                                | R            | TGTCCCATGTCTGGTTGATGACT                           |                    |
| qRT-PCR                                                        | YHKT (F)     | CCTCGTGCCTACACCTTGTA                              |                    |
|                                                                | YHKT (R)     | TGGCTGAAACGCACGAAGAA                              |                    |
| subcellular localization                                       | pAN580-GFP-f | aagtccggagctagctctagatgcccaaggacttgactgtttttcac   | <i>XbaI, BamH1</i> |
|                                                                | pAN580-GFP-r | agcgccgctgtacaggatccatcatcacaacgaacaccaccaatatagc |                    |
| Promoter clon                                                  | Promoter-F   | TTCCCCATTACGCTGCTGAG                              |                    |
|                                                                | Promoter-R   | CTTCCCCACCCACCAACATC                              |                    |
